# Supplementary material
Source: publisher site journal article supplement (https://www.dovepress.com/article/243826)
Supplement: Supplementary file 1 [file get_supplementary_file.php]

**Supplementary Data**

**Rapid determination of benzylpenicillin resistance in *Staphylococcus aureus* bacteraemia model**

JeongWoo Kang1,2*, Md Akil Hossain1, Hae-chul Park1, Yong-sang Kim1, Sung-won Park1 and Tae-Wan Kim2

1Veterinary drugs & Biologics Division, Animal and Plant Quarantine Agency (APQA), Gimcheon-si, Gyeongsangbuk-do, Republic of Korea

2Department of Physiology, College of Veterinary Medicine, Kyungpook National University, Daegu, Republic of Korea

**Running title:** Rapid detection of β-lactam resistance

*Corresponding authors: Tel: +82-54-912-0564; Fax: +82-54-912-0584; E-mail: hijach@korea.kr

**Supplementary Table 1** Signal intensities (a.u.) of Penicillin-G and the hydrolyzed form of Penicillin-G in the blood samples of infected or non-infected chickens at different time intervals.

| **Test Groups** | | **Time (min)** | | | | | | | |
| --- | --- | --- | --- | --- | --- | --- | --- | --- | --- |
| **0** | **5** | | **10** | | **20** | **30** | **60** |
| **Penicillin-G** | **Control** | 15751±701 | 5767293±752745 | 2061559±445133 | | 726986±357121 | | 376676±21571 | 135389±119532 |
| **Susceptible** | 15751±354 | 4843576±435712 | 1767911±659761 | | 761132±372512 | | 489450±450124 | 183298±171517 |
| **Resistant** | 15751±542 | 1697629±552143 | 346434±245218 | | 66260± 12187 | | 16565± 2517 | 29663± 2534 |
| **Hydrolyzed Penicillin-G** | **Control** | 7292±214 | 279856±61512 | 125426±15412 | | 58369±6521 | | 39645±2541 | 17555±351 |
| **Susceptible** | 7292±119 | 254567±26541 | 85090±34571 | | 52717±35176 | | 29406±8561 | 9887±225 |
| **Resistant** | 7292±2532 | 16266277±924157 | 11618769±1158541 | | 9875953±1514214 | | 9019459±854789 | 5859056±785905 |

Results are represented as mean±SD of 7 samples.
